# Supplementary material for: Predicting genetic interactions from Boolean models of biological networks
Source: Royal Society of Chemistry journal article supplement (doi:10.1039/c5ib00029g), 2015-01-01
Supplement: c5ib00029g1.zip [file c5ib00029g1.zip]

## Sheet: MAPK_apoptosis
INTERACTOR1	INTERACTOR2	P1	P2	P12	EPS_BEST_NORM	INEQUALITY	INEQ_TYPE	INEQ_DIR
AKT_ko	PTEN_ko	1.02056	0.0150788	1.01121	12.3789	B<WT=A=AB	suppressive	A->B
AP1_ko	PPP2CA_ko	0.977926	0.973898	0.4559	-5.62805	AB<WT=A=B	synthetic	symmetric
ATF2_ko	PPP2CA_ko	0.995086	0.973898	0.565747	-4.58376	AB<WT=A=B	synthetic	symmetric
CREB_ko	ATM_ko	1.21449	0.694839	1.14857	3.51775	B<WT=A=AB	suppressive	A->B
ATM_ko	MAX_ko	0.694839	0.750102	0.215435	-3.31267	AB<A=B<WT	additive	symmetric
ATM_ko	MDM2_oe	0.694839	0.628174	0	-4.73782	AB<A=B<WT	additive	symmetric
ATM_ko	MSK_ko	0.694839	0.650324	0.0283074	-4.59888	AB<A=B<WT	additive	symmetric
ATM_ko	p14_ko	0.694839	0.639298	0.0152003	-4.65689	AB<A=B<WT	additive	symmetric
ATM_ko	TGFBR_ko	0.694839	0.700909	0.127289	-3.89864	AB<A=B<WT	additive	symmetric
TGFBR_oe	ATM_ko	1.27447	0.694839	1.27074	4.44208	B<WT<A=AB	epistatic	A->B
ATM_oe	MAX_ko	1.27779	0.750102	1.2769	3.64312	B<WT<A=AB	epistatic	A->B
ATM_oe	MDM2_oe	1.27779	0.628174	1.27275	5.46017	B<WT<A=AB	epistatic	A->B
ATM_oe	MSK_ko	1.27779	0.650324	1.27849	5.18943	B<WT<A=AB	epistatic	A->B
ATM_oe	p14_ko	1.27779	0.639298	1.27613	5.33015	B<WT<A=AB	epistatic	A->B
ATM_oe	TGFBR_ko	1.27779	0.700909	1.27669	4.3901	B<WT<A=AB	epistatic	A->B
ATM_oe	TGFBR_oe	1.27779	1.27447	1.27856	-3.6447	WT<A=B=AB	asynthetic	symmetric
DUSP1_ko	ATM_ko	1.21736	0.694839	1.1485	3.48856	B<WT=A=AB	suppressive	A->B
DUSP1_ko	TGFBR_ko	1.21736	0.700909	1.14867	3.40127	B<WT=A=AB	suppressive	A->B
ERK_ko	MEK1_2_oe	1.00251	0	0.998338	12.4126	B<WT=A=AB	suppressive	A->B
FOXO3_oe	JNK_ko	0.995985	0	1.01064	12.5655	B<WT=A=AB	suppressive	A->B
PTEN_ko	GAB1_ko	0.0150788	1.01137	0.264416	3.09623	A<AB<WT=B	conditional	A->B
PTEN_ko	GRB2_ko	0.0150788	0.99497	0.428058	5.13509	A<AB<WT=B	conditional	A->B
JUN_ko	PPP2CA_ko	0.987854	0.973898	0.452297	-5.77857	AB<WT=A=B	synthetic	symmetric
MAP3K1_3_ko	GADD45_ko	0.941335	0.766366	0.430021	-3.27635	AB<WT=A=B	synthetic	symmetric
p14_oe	MAX_ko	1.03882	0.750102	1.03893	3.15312	B<WT=A=AB	suppressive	A->B
MDM2_ko	MAX_ko	1.0329	0.750102	1.02724	3.06808	B<WT=A=AB	suppressive	A->B
MSK_ko	MDM2_ko	0.650324	1.0329	1.26267	7.27634	A<WT=B<AB	conditional	A->B
MDM2_ko	p14_ko	1.0329	0.639298	1.03722	4.61503	B<WT=A=AB	suppressive	A->B
MDM2_oe	MSK_ko	0.628174	0.650324	0.643402	3.12317	A=B=AB<WT	asynthetic	symmetric
MDM2_oe	p14_ko	0.628174	0.639298	0.637986	3.14569	A=B=AB<WT	asynthetic	symmetric
MSK_ko	p14_ko	0.650324	0.639298	0.648948	3.09868	A=B=AB<WT	asynthetic	symmetric
MSK_ko	p14_oe	0.650324	1.03882	1.25853	7.17084	A<WT=B<AB	conditional	A->B
MTK1_ko	MAP3K1_3_ko	0.769548	0.941335	0.430027	-3.31046	AB<WT=A=B	synthetic	symmetric
MTK1_ko	RAS_ko	0.769548	0.946288	0.433733	-3.31473	AB<WT=A=B	synthetic	symmetric
MYC_ko	ATM_ko	0.651976	0.694839	0.016039	-4.75015	AB<A=B<WT	additive	symmetric
ATM_oe	MYC_ko	1.27779	0.651976	1.27535	5.12485	B<WT<A=AB	epistatic	A->B
MDM2_ko	MYC_ko	1.0329	0.651976	1.04085	4.4972	B<WT=A=AB	suppressive	A->B
MYC_ko	MDM2_oe	0.651976	0.628174	0.639987	3.06723	A=B=AB<WT	asynthetic	symmetric
MYC_ko	p14_ko	0.651976	0.639298	0.650891	3.10914	A=B=AB<WT	asynthetic	symmetric
p14_oe	MYC_ko	1.03882	0.651976	1.03539	4.37515	B<WT=A=AB	suppressive	A->B
MYC_oe	MAX_ko	1.03841	0.750102	1.02783	3.01924	B<WT=A=AB	suppressive	A->B
MSK_ko	MYC_oe	0.650324	1.03841	1.25535	7.13507	A<WT=B<AB	conditional	A->B
p38_ko	MYC_oe	0.0406372	1.03841	0.647305	7.51348	A<AB<WT=B	conditional	A->B
p21_ko	p70_oe	0.979515	0.984485	0.00516819	-10.8289	AB<WT=A=B	synthetic	symmetric
p38_ko	AKT_ko	0.0406372	1.02056	0.316424	3.41219	A<AB<WT=B	conditional	A->B
p38_ko	MDM2_ko	0.0406372	1.0329	0.644298	7.48	A<AB<WT=B	conditional	A->B
p38_ko	p14_oe	0.0406372	1.03882	0.638224	7.40028	A<AB<WT=B	conditional	A->B
p38_ko	PDK1_ko	0.0406372	1.02143	0.312686	3.36509	A<AB<WT=B	conditional	A->B
p38_ko	PI3K_ko	0.0406372	1.01947	0.315454	3.40089	A<AB<WT=B	conditional	A->B
p38_ko	PTEN_oe	0.0406372	1.02359	0.313512	3.37385	A<AB<WT=B	conditional	A->B
p53_oe	MAX_ko	1.16119	0.750102	1.1648	3.46267	B<WT=A=AB	suppressive	A->B
p53_oe	MDM2_oe	1.16119	0.628174	1.15547	5.07482	B<WT=A=AB	suppressive	A->B
p53_oe	MSK_ko	1.16119	0.650324	1.27862	6.29057	B<WT=A=AB	suppressive	A->B
p53_oe	MYC_ko	1.16119	0.651976	1.15879	4.77717	B<WT=A=AB	suppressive	A->B
p53_oe	p14_ko	1.16119	0.639298	1.16363	5.0178	B<WT=A=AB	suppressive	A->B
p53_oe	p38_ko	1.16119	0.0406372	1.25832	15.0195	B<WT=A=AB	suppressive	A->B
PDK1_ko	PTEN_ko	1.02143	0.0150788	1.01164	12.384	B<WT=A=AB	suppressive	A->B
PI3K_ko	PTEN_ko	1.01947	0.0150788	1.02249	12.5194	B<WT=A=AB	suppressive	A->B
RAS_ko	GADD45_ko	0.946288	0.766366	0.429453	-3.32849	AB<WT=A=B	synthetic	symmetric
TAK1_oe	ATM_ko	1.2391	0.694839	1.19296	3.82622	B<WT=A=AB	suppressive	A->B
TAK1_oe	ATM_oe	1.2391	1.27779	1.27856	-3.18845	WT<A=B=AB	asynthetic	symmetric
TAK1_oe	TGFBR_ko	1.2391	0.700909	1.1982	3.80078	B<WT=A=AB	suppressive	A->B
TAK1_oe	TGFBR_oe	1.2391	1.27447	1.27565	-3.17907	WT<A=B=AB	asynthetic	symmetric
TAOK_oe	ATM_ko	1.23658	0.694839	1.19521	3.87918	B<WT=A=AB	suppressive	A->B
TAOK_oe	ATM_oe	1.23658	1.27779	1.27785	-3.16376	WT<A=B=AB	asynthetic	symmetric
TAOK_oe	TGFBR_ko	1.23658	0.700909	1.19733	3.81514	B<WT=A=AB	suppressive	A->B
TAOK_oe	TGFBR_oe	1.23658	1.27447	1.27671	-3.13461	WT<A=B=AB	asynthetic	symmetric
CREB_ko	TGFBR_ko	1.21449	0.700909	1.13832	3.30116	B<WT=A=AB	suppressive	A->B

## Sheet: MAPK_GA
INTERACTOR1	INTERACTOR2	P1	P2	P12	EPS_BEST_NORM	INEQUALITY	INEQ_TYPE	INEQ_DIR
AKT_oe	p21_oe	0	13.0066	59.3155	15.5022	A<WT<B<AB	single-nonmonotonic	A->B
AP1_ko	PPP2CA_ko	0.998695	1.149	24.5833	6.14258	WT=A=B<AB	synthetic	symmetric
ATF2_ko	PPP2CA_ko	0.965478	1.149	19.7441	4.88684	WT=A=B<AB	synthetic	symmetric
ATM_oe	BCL2_oe	0.0251498	46.6093	59.274	5.45969	A<WT<B<AB	single-nonmonotonic	A->B
ATM_oe	ERK_oe	0.0251498	44.7263	59.2855	5.92592	A<WT<B<AB	single-nonmonotonic	A->B
ATM_oe	FOXO3_ko	0.0251498	46.5537	59.2977	5.47958	A<WT<B<AB	single-nonmonotonic	A->B
ATM_oe	JNK_ko	0.0251498	46.581	59.2947	5.47209	A<WT<B<AB	single-nonmonotonic	A->B
ATM_oe	MEK1_2_oe	0.0251498	44.769	59.2564	5.90782	A<WT<B<AB	single-nonmonotonic	A->B
BCL2_oe	JNK_ko	46.6093	46.581	46.6246	-7.50608	WT<A=B=AB	asynthetic	symmetric
BCL2_oe	p38_ko	46.6093	1.04039	2.39611	-7.59002	WT=B<AB<A	conditional	A->B
BCL2_oe	PTEN_ko	46.6093	0.0787117	0.828341	-7.14803	B<WT=AB<A	additive	symmetric
CREB_ko	BCL2_oe	0.23483	46.6093	56.3656	3.88057	A<WT<B<AB	single-nonmonotonic	A->B
CREB_ko	ERK_oe	0.23483	44.7263	57.4046	4.61532	A<WT<B<AB	single-nonmonotonic	A->B
CREB_ko	FOXO3_ko	0.23483	46.5537	56.4193	3.90829	A<WT<B<AB	single-nonmonotonic	A->B
CREB_ko	JNK_ko	0.23483	46.581	56.5207	3.92807	A<WT<B<AB	single-nonmonotonic	A->B
CREB_ko	MEK1_2_oe	0.23483	44.769	57.3303	4.58541	A<WT<B<AB	single-nonmonotonic	A->B
DUSP1_ko	BCL2_oe	0.298357	46.6093	56.5771	3.84281	A<WT<B<AB	single-nonmonotonic	A->B
DUSP1_ko	JNK_ko	0.298357	46.581	56.7445	3.89355	A<WT<B<AB	single-nonmonotonic	A->B
DUSP1_ko	ERK_oe	0.298357	44.7263	57.3391	4.50518	A<WT<B<AB	single-nonmonotonic	A->B
DUSP1_ko	FOXO3_ko	0.298357	46.5537	56.6509	3.87578	A<WT<B<AB	single-nonmonotonic	A->B
DUSP1_ko	MEK1_2_oe	0.298357	44.769	57.259	4.47375	A<WT<B<AB	single-nonmonotonic	A->B
EGFR_oe	FOXO3_ko	0.385195	46.5537	53.8456	3.04086	A<WT<B<AB	single-nonmonotonic	A->B
ERK_ko	MEK1_2_oe	1.08079	44.769	1.10072	-7.52357	WT=A=AB<B	suppressive	A->B
ERK_oe	BCL2_oe	44.7263	46.6093	44.9848	-7.48674	WT<A<AB<B	single-nonmonotonic	A->B
ERK_oe	FOXO3_ko	44.7263	46.5537	44.9509	-7.48336	WT<A<AB<B	single-nonmonotonic	A->B
ERK_oe	JNK_ko	44.7263	46.581	44.8823	-7.50058	WT<A=AB<B	epistatic	A->B
ERK_oe	MEK1_2_oe	44.7263	44.769	44.6951	-7.22323	WT<A=B=AB	asynthetic	symmetric
ERK_oe	p38_ko	44.7263	1.04039	11.16	-5.66531	WT=B<AB<A	conditional	A->B
ERK_oe	p53_oe	44.7263	5.44765	59.3155	3.16787	WT<B<A<AB	additive	symmetric
ERK_oe	PTEN_ko	44.7263	0.0787117	0.486862	-6.88665	B<AB<WT<A	additive	symmetric
FGFR3_oe	BCL2_oe	0.402218	46.6093	53.8212	3.00327	A<WT<B<AB	single-nonmonotonic	A->B
FOXO3_ko	BCL2_oe	46.5537	46.6093	46.8589	-7.45857	WT<A=B<AB	additive	symmetric
FOXO3_ko	JNK_ko	46.5537	46.581	46.4894	-7.5212	WT<A=B=AB	asynthetic	symmetric
FOXO3_ko	p38_ko	46.5537	1.04039	2.28762	-7.60027	WT=B<AB<A	conditional	A->B
FOXO3_ko	PTEN_ko	46.5537	0.0787117	0.766712	-7.14973	B<AB<WT<A	additive	symmetric
FOXO3_oe	JNK_ko	0.624533	46.581	0.649149	-7.7385	A=AB<WT<B	epistatic	A->B
GADD45_ko	ERK_oe	5.72187	44.7263	24.8564	-4.12872	WT<A<AB<B	single-nonmonotonic	A->B
GADD45_ko	MEK1_2_oe	5.72187	44.769	25.2382	-4.06632	WT<A<AB<B	single-nonmonotonic	A->B
JNK_ko	PTEN_ko	46.581	0.0787117	0.776143	-7.15269	B<AB<WT<A	additive	symmetric
JNK_ko	p38_ko	46.581	1.04039	8.29907	-6.50683	WT=B<AB<A	conditional	A->B
JUN_ko	PPP2CA_ko	1.01115	1.149	24.8906	6.21952	WT=A=B<AB	synthetic	symmetric
MAP3K1_3_oe	BCL2_oe	0.312771	46.6093	54.5465	3.29353	A<WT<B<AB	single-nonmonotonic	A->B
MAP3K1_3_oe	ERK_oe	0.312771	44.7263	52.9139	3.33006	A<WT<B<AB	single-nonmonotonic	A->B
MAP3K1_3_oe	FOXO3_ko	0.312771	46.5537	54.3802	3.26375	A<WT<B<AB	single-nonmonotonic	A->B
MAP3K1_3_oe	JNK_ko	0.312771	46.581	54.0929	3.18198	A<WT<B<AB	single-nonmonotonic	A->B
MAP3K1_3_oe	MEK1_2_oe	0.312771	44.769	52.9058	3.31745	A<WT<B<AB	single-nonmonotonic	A->B
MDM2_oe	p21_oe	0.0480456	13.0066	29.8969	5.81427	A<WT<B<AB	single-nonmonotonic	A->B
MEK1_2_oe	BCL2_oe	44.769	46.6093	44.9602	-7.49857	WT<A=AB<B	epistatic	A->B
MEK1_2_oe	FOXO3_ko	44.769	46.5537	44.9559	-7.48978	WT<A=AB<B	epistatic	A->B
MEK1_2_oe	JNK_ko	44.769	46.581	44.7866	-7.5254	WT<A=AB<B	epistatic	A->B
MEK1_2_oe	p38_ko	44.769	1.04039	11.3161	-5.64414	WT=B<AB<A	conditional	A->B
MEK1_2_oe	PTEN_ko	44.769	0.0787117	0.416217	-6.90689	B<AB<WT<A	additive	symmetric
MSK_ko	p21_oe	0.513198	13.0066	29.0011	4.68169	A<WT<B<AB	single-nonmonotonic	A->B
MTK1_ko	ERK_oe	5.41675	44.7263	24.9753	-4.05341	WT<A<AB<B	single-nonmonotonic	A->B
MTK1_ko	MEK1_2_oe	5.41675	44.769	24.6898	-4.1129	WT<A<AB<B	single-nonmonotonic	A->B
MYC_ko	p21_oe	0.330921	13.0066	29.3833	4.96073	A<WT<B<AB	single-nonmonotonic	A->B
p14_ko	p21_oe	0.315558	13.0066	29.5117	5.0131	A<WT<B<AB	single-nonmonotonic	A->B
p21_oe	ATM_ko	13.0066	1.98576	26.8738	3.43874	WT<B<A<AB	additive	symmetric
p21_oe	p38_ko	13.0066	1.04039	57.2889	11.7534	WT=B<A<AB	conditional	A->B
p21_oe	TGFBR_ko	13.0066	1.80461	27.0475	3.5451	WT<B<A<AB	additive	symmetric
p53_ko	p21_oe	0	13.0066	59.3155	15.5022	A<WT<B<AB	single-nonmonotonic	A->B
p53_oe	MEK1_2_oe	5.44765	44.769	59.3155	3.15736	WT<A<B<AB	additive	symmetric
PLCG_oe	BCL2_oe	0.312771	46.6093	54.1652	3.19388	A<WT<B<AB	single-nonmonotonic	A->B
PLCG_oe	ERK_oe	0.312771	44.7263	52.2352	3.1527	A<WT<B<AB	single-nonmonotonic	A->B
PLCG_oe	FOXO3_ko	0.312771	46.5537	54.151	3.20385	A<WT<B<AB	single-nonmonotonic	A->B
PLCG_oe	JNK_ko	0.312771	46.581	53.8267	3.11239	A<WT<B<AB	single-nonmonotonic	A->B
PLCG_oe	MEK1_2_oe	0.312771	44.769	52.5001	3.21143	A<WT<B<AB	single-nonmonotonic	A->B
PTEN_ko	p21_oe	0.0787117	13.0066	58.5306	13.1192	A<WT<B<AB	single-nonmonotonic	A->B
RAS_oe	BCL2_oe	0.379797	46.6093	54.4052	3.17914	A<WT<B<AB	single-nonmonotonic	A->B
RAS_oe	ERK_oe	0.379797	44.7263	52.7836	3.21852	A<WT<B<AB	single-nonmonotonic	A->B
RAS_oe	FOXO3_ko	0.379797	46.5537	54.2957	3.16419	A<WT<B<AB	single-nonmonotonic	A->B
RAS_oe	JNK_ko	0.379797	46.581	53.8369	3.03759	A<WT<B<AB	single-nonmonotonic	A->B
RAS_oe	MEK1_2_oe	0.379797	44.769	52.8208	3.21775	A<WT<B<AB	single-nonmonotonic	A->B
SOS_oe	BCL2_oe	0.351088	46.6093	54.0716	3.12353	A<WT<B<AB	single-nonmonotonic	A->B
SOS_oe	ERK_oe	0.351088	44.7263	52.3243	3.13006	A<WT<B<AB	single-nonmonotonic	A->B
SOS_oe	FOXO3_ko	0.351088	46.5537	53.6817	3.0353	A<WT<B<AB	single-nonmonotonic	A->B
SOS_oe	MEK1_2_oe	0.351088	44.769	52.3074	3.11514	A<WT<B<AB	single-nonmonotonic	A->B
TAK1_oe	BCL2_oe	0.277893	46.6093	57.6205	4.14333	A<WT<B<AB	single-nonmonotonic	A->B
TAK1_oe	ERK_oe	0.277893	44.7263	57.2717	4.51539	A<WT<B<AB	single-nonmonotonic	A->B
TAK1_oe	FOXO3_ko	0.277893	46.5537	57.568	4.1433	A<WT<B<AB	single-nonmonotonic	A->B
TAK1_oe	MEK1_2_oe	0.277893	44.769	57.5712	4.58315	A<WT<B<AB	single-nonmonotonic	A->B
TAK1_oe	JNK_ko	0.277893	46.581	57.5808	4.13993	A<WT<B<AB	single-nonmonotonic	A->B
TAOK_oe	BCL2_oe	0.313779	46.6093	57.609	4.09267	A<WT<B<AB	single-nonmonotonic	A->B
TAOK_oe	ERK_oe	0.313779	44.7263	57.4982	4.52692	A<WT<B<AB	single-nonmonotonic	A->B
TAOK_oe	FOXO3_ko	0.313779	46.5537	57.5668	4.0953	A<WT<B<AB	single-nonmonotonic	A->B
TAOK_oe	MEK1_2_oe	0.313779	44.769	57.4975	4.51623	A<WT<B<AB	single-nonmonotonic	A->B
TAOK_oe	JNK_ko	0.313779	46.581	57.5937	4.09563	A<WT<B<AB	single-nonmonotonic	A->B
TGFBR_oe	BCL2_oe	0.104633	46.6093	59.1787	4.91901	A<WT<B<AB	single-nonmonotonic	A->B
TGFBR_oe	ERK_oe	0.104633	44.7263	59.1973	5.38707	A<WT<B<AB	single-nonmonotonic	A->B
TGFBR_oe	FOXO3_ko	0.104633	46.5537	59.194	4.93668	A<WT<B<AB	single-nonmonotonic	A->B
TGFBR_oe	JNK_ko	0.104633	46.581	59.1608	4.9213	A<WT<B<AB	single-nonmonotonic	A->B
TGFBR_oe	MEK1_2_oe	0.104633	44.769	59.1279	5.35843	A<WT<B<AB	single-nonmonotonic	A->B

## Sheet: MAPK_proliferation
INTERACTOR1	INTERACTOR2	P1	P2	P12	EPS_BEST_NORM	INEQUALITY	INEQ_TYPE	INEQ_DIR
AKT_ko	ERK_oe	0.127786	7.46534	0.117691	-5.76148	A=AB<WT<B	epistatic	A->B
AKT_ko	MEK1_2_oe	0.127786	7.44174	0.113143	-5.7351	A=AB<WT<B	epistatic	A->B
DUSP1_oe	CREB_oe	2.39939	2.33082	2.33843	-3.05849	WT<A=B=AB	asynthetic	symmetric
EGFR_oe	RAF_oe	1.78474	4.67308	2.04025	-5.93959	WT<A<AB<B	single-nonmonotonic	A->B
EGFR_oe	ERK_oe	1.78474	7.46534	4.10153	-7.3832	WT<A<AB<B	single-nonmonotonic	A->B
EGFR_oe	MEK1_2_oe	1.78474	7.44174	4.19413	-7.23175	WT<A<AB<B	single-nonmonotonic	A->B
ERK_oe	AKT_oe	7.46534	1.00219	31.8629	6.94692	WT=B<A<AB	conditional	A->B
ERK_oe	CREB_ko	7.46534	0.0785035	0.861474	-3.84935	B<WT=AB<A	additive	symmetric
ERK_oe	CREB_oe	7.46534	2.33082	7.33656	-4.31686	WT<B<A=AB	epistatic	A->B
ERK_oe	DUSP1_ko	7.46534	0.0754717	0.888921	-3.73855	B<WT=AB<A	additive	symmetric
ERK_oe	DUSP1_oe	7.46534	2.39939	7.52869	-4.19548	WT<B<A=AB	epistatic	A->B
ERK_oe	GRB2_ko	7.46534	0.610063	4.1541	-4.14741	B<WT<AB<A	additive	symmetric
ERK_oe	MEK1_2_oe	7.46534	7.44174	7.51263	-11.8876	WT<A=B=AB	asynthetic	symmetric
ERK_oe	MSK_oe	7.46534	2.84435	7.32572	-5.21667	WT<B<A=AB	epistatic	A->B
ERK_oe	p21_ko	7.46534	1.05215	31.6405	6.848	WT=B<A<AB	conditional	A->B
ERK_oe	p38_ko	7.46534	1.55252	21.0853	3.42839	WT<B<A<AB	additive	symmetric
ERK_oe	p53_ko	7.46534	1.65793	31.8044	6.55918	WT<B<A<AB	additive	symmetric
ERK_oe	p70_oe	7.46534	2.35839	7.45019	-4.22212	WT<B<A=AB	epistatic	A->B
ERK_oe	PTEN_ko	7.46534	1.06847	31.7117	6.85862	WT=B<A<AB	conditional	A->B
ERK_oe	RAF_oe	7.46534	4.67308	7.38629	-7.99612	WT<B<A=AB	epistatic	A->B
FGFR3_oe	ERK_oe	1.66222	7.46534	3.36478	-8.06504	WT<A<AB<B	single-nonmonotonic	A->B
FGFR3_oe	RAF_oe	1.66222	4.67308	1.84831	-5.93454	WT<A=AB<B	epistatic	A->B
FGFR3_oe	MEK1_2_oe	1.66222	7.44174	3.45219	-7.92018	WT<A<AB<B	single-nonmonotonic	A->B
GAB1_ko	ERK_oe	0.142525	7.46534	0	-6.13488	A=AB<WT<B	epistatic	A->B
GAB1_ko	MEK1_2_oe	0.142525	7.44174	0	-6.10253	A=AB<WT<B	epistatic	A->B
MAP3K1_3_oe	ERK_oe	1.43458	7.46534	3.34462	-7.59414	WT<A<AB<B	single-nonmonotonic	A->B
MAP3K1_3_oe	RAF_oe	1.43458	4.67308	1.48086	-5.91283	WT<A=AB<B	epistatic	A->B
MAP3K1_3_oe	MEK1_2_oe	1.43458	7.44174	3.34114	-7.56453	WT<A<AB<B	single-nonmonotonic	A->B
MEK1_2_oe	AKT_oe	7.44174	1.00219	31.9431	6.97868	WT=B<A<AB	conditional	A->B
MEK1_2_oe	CREB_ko	7.44174	0.0785035	0.874794	-3.8015	B<WT=AB<A	additive	symmetric
MEK1_2_oe	CREB_oe	7.44174	2.33082	7.56281	-3.99594	WT<B<A=AB	epistatic	A->B
MEK1_2_oe	DUSP1_ko	7.44174	0.0754717	0.919948	-3.66837	B<WT=AB<A	additive	symmetric
MEK1_2_oe	DUSP1_oe	7.44174	2.39939	7.47102	-4.23449	WT<B<A=AB	epistatic	A->B
MEK1_2_oe	GRB2_ko	7.44174	0.610063	4.27238	-3.9637	B<WT<AB<A	additive	symmetric
MEK1_2_oe	MSK_oe	7.44174	2.84435	7.35101	-5.1505	WT<B<A=AB	epistatic	A->B
MEK1_2_oe	p38_ko	7.44174	1.55252	21.0317	3.42044	WT<B<A<AB	additive	symmetric
MEK1_2_oe	PTEN_ko	7.44174	1.06847	31.7845	6.8882	WT=B<A<AB	conditional	A->B
MEK1_2_oe	p21_ko	7.44174	1.05215	31.6213	6.85024	WT=B<A<AB	conditional	A->B
MEK1_2_oe	p70_oe	7.44174	2.35839	7.35875	-4.30394	WT<B<A=AB	epistatic	A->B
MSK_oe	CREB_oe	2.84435	2.33082	2.87644	-3.10582	WT<B<A=AB	epistatic	A->B
MSK_oe	DUSP1_oe	2.84435	2.39939	2.80242	-3.31741	WT<B<A=AB	epistatic	A->B
p53_ko	MEK1_2_oe	1.65793	7.44174	31.83	6.57477	WT<A<B<AB	additive	symmetric
p53_ko	p70_oe	1.65793	2.35839	24.7959	6.25027	WT<A<B<AB	additive	symmetric
p70_oe	AKT_oe	2.35839	1.00219	27.6669	7.42138	WT=B<A<AB	conditional	A->B
p70_oe	PTEN_ko	2.35839	1.06847	27.3225	7.28366	WT=B<A<AB	conditional	A->B
PLCG_oe	ERK_oe	1.47334	7.46534	3.10595	-7.98421	WT<A<AB<B	single-nonmonotonic	A->B
PLCG_oe	MEK1_2_oe	1.47334	7.44174	3.00571	-8.07726	WT<A<AB<B	single-nonmonotonic	A->B
PLCG_oe	RAF_oe	1.47334	4.67308	1.51776	-5.95183	WT<A=AB<B	epistatic	A->B
PTEN_oe	ERK_oe	0.118497	7.46534	0.0970166	-5.63417	A=AB<WT<B	epistatic	A->B
PTEN_oe	MEK1_2_oe	0.118497	7.44174	0.092985	-5.60729	A=AB<WT<B	epistatic	A->B
RAF_oe	MEK1_2_oe	4.67308	7.44174	7.15636	-8.25347	WT<A<AB<B	single-nonmonotonic	A->B
RAS_oe	ERK_oe	1.50479	7.46534	3.43832	-7.63289	WT<A<AB<B	single-nonmonotonic	A->B
RAS_oe	MEK1_2_oe	1.50479	7.44174	3.39674	-7.65156	WT<A<AB<B	single-nonmonotonic	A->B
RAS_oe	RAF_oe	1.50479	4.67308	1.49579	-6.04837	WT<A=AB<B	epistatic	A->B
SOS_oe	ERK_oe	1.7999	7.46534	3.76713	-7.83769	WT<A<AB<B	single-nonmonotonic	A->B
SOS_oe	MEK1_2_oe	1.7999	7.44174	3.78055	-7.78662	WT<A<AB<B	single-nonmonotonic	A->B
SOS_oe	RAF_oe	1.7999	4.67308	1.80406	-6.26915	WT<A=AB<B	epistatic	A->B
