# Supplementary material for: Predicting genetic interactions from Boolean models of biological networks
Source: Royal Society of Chemistry journal article supplement (doi:10.1039/c5ib00029g), 2015-01-01
Supplement: c5ib00029g3.xlsx [file c5ib00029g3.xlsx]

## Sheet: MAPK
INTERACTOR1	INTERACTOR2	P1	P2	P12	EPS_BEST_NORM	INEQUALITY	INEQ_TYPE	INEQ_DIR
AP1_ko	PPP2CA_ko	0.977926	0.973898	0.4559	-5.62805	AB<WT=A=B	synthetic	symmetric		black	apoptosis
AP1_ko	PPP2CA_ko	0.998695	1.149	24.5833	6.14258	WT=A=B<AB	synthetic	symmetric		blue	GA
										red	prolif
ATF2_ko	PPP2CA_ko	0.995086	0.973898	0.565747	-4.58376	AB<WT=A=B	synthetic	symmetric
ATF2_ko	PPP2CA_ko	0.965478	1.149	19.7441	4.88684	WT=A=B<AB	synthetic	symmetric			different type of interactions for the same pairs but different phenotypes
ERK_ko	MEK1_2_oe	1.00251	0	0.998338	12.4126	B<WT=A=AB	suppressive	A->B			description in the text
ERK_ko	MEK1_2_oe	1.08079	44.769	1.10072	-7.52357	WT=A=AB<B	suppressive	A->B
ERK_oe	MEK1_2_oe	44.7263	44.769	44.6951	-7.22323	WT<A=B=AB	asynthetic	symmetric			MEK1 and ERK overexpressed have complementary roles:
ERK_oe	MEK1_2_oe	7.46534	7.44174	7.51263	-11.8876	WT<A=B=AB	asynthetic	symmetric			1. when the two are combined, they give exactly the same type of genetic interactions for two antagonist phenotypes (proliferation and growth arrest),
											2. they seem to have very similar roles when either of them is combined with p38 and PTEN deleted and for the two antagonist phenotypes.
ERK_oe	p38_ko	44.7263	1.04039	11.16	-5.66531	WT=B<AB<A	conditional	A->B
ERK_oe	p38_ko	7.46534	1.55252	21.0853	3.42839	WT<B<A<AB	additive	symmetric
ERK_oe	PTEN_ko	44.7263	0.0787117	0.486862	-6.88665	B<AB<WT<A	additive	symmetric
ERK_oe	PTEN_ko	7.46534	1.06847	31.7117	6.85862	WT=B<A<AB	conditional	A->B
FOXO3_oe	JNK_ko	0.995985	0	1.01064	12.5655	B<WT=A=AB	suppressive	A->B
FOXO3_oe	JNK_ko	0.624533	46.581	0.649149	-7.7385	A=AB<WT<B	epistatic	A->B
JUN_ko	PPP2CA_ko	0.987854	0.973898	0.452297	-5.77857	AB<WT=A=B	synthetic	symmetric
JUN_ko	PPP2CA_ko	1.01115	1.149	24.8906	6.21952	WT=A=B<AB	synthetic	symmetric
MAP3K1_3_oe	ERK_oe	0.312771	44.7263	52.9139	3.33006	A<WT<B<AB	single-nonmonotonic	A->B
MAP3K1_3_oe	ERK_oe	1.43458	7.46534	3.34462	-7.59414	WT<A<AB<B	single-nonmonotonic	A->B
MAP3K1_3_oe	MEK1_2_oe	0.312771	44.769	52.9058	3.31745	A<WT<B<AB	single-nonmonotonic	A->B
MAP3K1_3_oe	MEK1_2_oe	1.43458	7.44174	3.34114	-7.56453	WT<A<AB<B	single-nonmonotonic	A->B
MEK1_2_oe	p38_ko	44.769	1.04039	11.3161	-5.64414	WT=B<AB<A	conditional	A->B
MEK1_2_oe	p38_ko	7.44174	1.55252	21.0317	3.42044	WT<B<A<AB	additive	symmetric
MEK1_2_oe	PTEN_ko	44.769	0.0787117	0.416217	-6.90689	B<AB<WT<A	additive	symmetric
MEK1_2_oe	PTEN_ko	7.44174	1.06847	31.7845	6.8882	WT=B<A<AB	conditional	A->B
PLCG_oe	ERK_oe	0.312771	44.7263	52.2352	3.1527	A<WT<B<AB	single-nonmonotonic	A->B
PLCG_oe	ERK_oe	1.47334	7.46534	3.10595	-7.98421	WT<A<AB<B	single-nonmonotonic	A->B
PLCG_oe	MEK1_2_oe	0.312771	44.769	52.5001	3.21143	A<WT<B<AB	single-nonmonotonic	A->B
PLCG_oe	MEK1_2_oe	1.47334	7.44174	3.00571	-8.07726	WT<A<AB<B	single-nonmonotonic	A->B
RAS_oe	ERK_oe	0.379797	44.7263	52.7836	3.21852	A<WT<B<AB	single-nonmonotonic	A->B
RAS_oe	ERK_oe	1.50479	7.46534	3.43832	-7.63289	WT<A<AB<B	single-nonmonotonic	A->B
RAS_oe	MEK1_2_oe	0.379797	44.769	52.8208	3.21775	A<WT<B<AB	single-nonmonotonic	A->B
RAS_oe	MEK1_2_oe	1.50479	7.44174	3.39674	-7.65156	WT<A<AB<B	single-nonmonotonic	A->B
SOS_oe	ERK_oe	0.351088	44.7263	52.3243	3.13006	A<WT<B<AB	single-nonmonotonic	A->B
SOS_oe	ERK_oe	1.7999	7.46534	3.76713	-7.83769	WT<A<AB<B	single-nonmonotonic	A->B
SOS_oe	MEK1_2_oe	0.351088	44.769	52.3074	3.11514	A<WT<B<AB	single-nonmonotonic	A->B
SOS_oe	MEK1_2_oe	1.7999	7.44174	3.78055	-7.78662	WT<A<AB<B	single-nonmonotonic	A->B
ERK_oe	p53_oe	44.7263	5.44765	59.3155	3.16787	WT<B<A<AB	additive	symmetric
ERK_oe	p53_ko	7.46534	1.65793	31.8044	6.55918	WT<B<A<AB	additive	symmetric

## Sheet: cellfate
INTERACTOR1	INTERACTOR2	P1	P2	P12	EPS_BEST_NORM	INEQUALITY	INEQ_TYPE	INEQ_DIR
ATP_ko	MPT_ko	0	2.52917	0	-2.04542	A=AB<WT<B	epistatic	A->B		black	apoptosis
ATP_ko	MPT_ko	1.68565	0	1.592	2.58762	B<WT<A=AB	epistatic	A->B		red	survival
										blue	necrosis
ATP_ko	ROS_ko	0	2.56906	0	-2.07769	A=AB<WT<B	epistatic	A->B
ATP_ko	ROS_ko	1.68565	0	1.62286	2.69688	B<WT<A=AB	epistatic	A->B			different type of interactions for the same pairs but different phenotypes
IKK_ko	RIP1ub_oe	1.29635	0.00166311	1.2891	2.21633	B<WT<A=AB	epistatic	A->B			description in the text
IKK_ko	RIP1ub_oe	0	8.88146	0	-5.19765	A=AB<WT<B	epistatic	A->B
											When IKK is deleted, the overexpression of RIP1_ub has no effect on either survival or necrosis phenotypes,
IKK_oe	BAX_oe	0.450908	2.12587	4.10811	2.28206	A<WT<B<AB	single-nonmonotonic	A->B			which confirms the results from the initial article, that, for the survival pathway, IKK is downstream of RIP1_ub and that any modification upstream of IKK has no effect on the output
IKK_oe	BAX_oe	8.97353	0	0.539033	-4.81427	B<AB<WT<A	additive	symmetric			Whereas when looking at the necrotic phenotype (NonACD), even if IKK is deleted, the probability to reach the necrotic phenotypes is not increased, the decision between the two phenotypes being made earlier, at the level of RIP1 (modified into RIP1_ub for survival and RIP1K for necrosis)
											Same thing is observed for CASP8 overexpression and MPT overexpressed for the two apoptosis and necrosis phenotypes.
IKK_oe	MOMP_oe	0.450908	2.12964	4.16547	2.33325	A<WT<B<AB	single-nonmonotonic	A->B
IKK_oe	MOMP_oe	8.97353	0	0.505686	-4.84132	B<AB<WT<A	additive	symmetric
MPT_oe	CASP8_oe	0	3.39851	0	-2.74849	A=AB<WT<B	epistatic	A->B
MPT_oe	CASP8_oe	1.90723	0.636291	1.90723	2.15185	B<WT<A=AB	epistatic	A->B
MPT_oe	ROS_ko	0	2.56906	0	-2.07769	A=AB<WT<B	epistatic	A->B
MPT_oe	ROS_ko	1.90723	0	1.90723	3.30294	B<WT<A=AB	epistatic	A->B
NFkB_ko	IKK_oe	1.38549	0.0016097	1.38351	2.38945	B<WT<A=AB	epistatic	A->B
NFkB_ko	IKK_oe	0	8.97353	0	-5.25153	A=AB<WT<B	epistatic	A->B
NFkB_ko	RIP1ub_oe	1.38549	0.00166311	1.39144	2.41745	B<WT<A=AB	epistatic	A->B
NFkB_ko	RIP1ub_oe	0	8.88146	0	-5.19765	A=AB<WT<B	epistatic	A->B
RIP1_oe	cIAP_oe	1.43275	0.452899	0.00625191	-2.49641	AB<B<WT<A	single-nonmonotonic	A->B
RIP1_oe	cIAP_oe	2.45425	3.38407	9.73365	3.52334	WT<A<B<AB	additive	symmetric
RIP1K_oe	CASP8_oe	0.000203998	3.39851	0	-2.74865	A=AB<WT<B	epistatic	A->B
RIP1K_oe	CASP8_oe	1.7265	0.636291	1.90723	2.4788	B<WT<A=AB	epistatic	A->B
RIP1ub_oe	MOMP_oe	0.49542	2.12964	4.1817	2.32165	A<WT<B<AB	single-nonmonotonic	A->B
RIP1ub_oe	MOMP_oe	8.88146	0	0.495706	-4.79553	B<AB<WT<A	additive	symmetric
ROS_oe	CASP8_oe	0.000305998	3.39851	0	-2.74873	A=AB<WT<B	epistatic	A->B
ROS_oe	CASP8_oe	1.75782	0.636291	1.90723	2.42214	B<WT<A=AB	epistatic	A->B

## Sheet: restriction
INTERACTOR1	INTERACTOR2	P1	P2	P12	EPS_BEST_NORM	INEQUALITY	INEQ_TYPE	INEQ_DIR		Legend
Cdc20_ko	cdh1_ko	0.501066	0.302471	0	-3.25315	AB<A=B<WT	additive	symmetric		black	growth arrest
Cdc20_ko	cdh1_ko	1.49893	1.37316	1.99974	1.61106	WT<A=B<AB	additive	symmetric		blue	proliferation
cdh1_oe	Cdc20_ko	1.00033	0.501066	1.00033	1.33828	B<WT=A=AB	suppressive	A->B
cdh1_oe	Cdc20_ko	0.999934	1.49893	0.999934	-1.00987	WT=A=AB<B	suppressive	A->B
CycB_ko	Cdc20_ko	1.00033	0.501066	1.00033	1.33828	B<WT=A=AB	suppressive	A->B
CycB_ko	Cdc20_ko	0.999934	1.49893	0.999934	-1.00987	WT=A=AB<B	suppressive	A->B
